# Supplementary material for: Exploring the link between home garden use and severe obesity: Insights from a nationwide survey in Tuvalu
Source: PubMed Central journal article supplement (PMC10472202; doi:10.7189/jogh.13.04097), 2023-09-01
Supplement: jogh-13-04097-s001.pdf [file jogh-13-04097-s001.pdf]

**Supplement Table 1.** *Number of participants from each outlying island in the study.*

| <b>Island name</b>            | <b>Count (%)</b> |
|-------------------------------|------------------|
| <i>Main island (Funafuti)</i> | 630 (61.5)       |
| <i>North islands</i>          |                  |
| Nanumea                       | 50 (4.9)         |
| Nanumaga                      | 49 (4.8)         |
| Niutao                        | 50 (4.9)         |
| <i>Middle islands</i>         |                  |
| Vaitupu                       | 76 (7.4)         |
| Nui                           | 60 (5.9)         |
| Nukufetau                     | 59 (5.8)         |
| <i>South islands</i>          |                  |
| Nukulaelae                    | 30 (2.9)         |
| Niulakita                     | 20 (2.1)         |

a. Outlying islands are grouped into three island groups: (1) North three islands (including Nanumea, Nanumaga, and Niutao), (2) Middle three islands (including Vaitupu, Nukufetau, and Nui), and (3) South two islands (including Nukulaelae and Niulakita).

**Supplement Table 2.** *Multivariable regressions between home garden use and obesity prevalence, among population without non-communicable diseases<sup>a</sup>*

| <b>Predictor variables</b> | <b>Unadjusted model</b>                          | <b>Fully adjusted model<sup>b</sup></b> | <b>Overlap weight model<sup>c</sup></b> |
|----------------------------|--------------------------------------------------|-----------------------------------------|-----------------------------------------|
| <b>(a) Obesity</b>         | Odds ratio (95% confidence interval and p-value) |                                         |                                         |
| Home garden use            | 0.914 (0.657-1.279,<br>p=0.596)                  | 0.863 (0.611-1.226,<br>p=0.409)         | 0.967 (0.904-1.036,<br>p=0.343)         |
| <b>(b) Severe obesity</b>  |                                                  |                                         |                                         |
| Home garden use            | 0.771 (0.515-1.135,<br>p=0.196)                  | 0.738 (0.488-1.099,<br>p=0.142)         | 0.955 (0.901-1.012,<br>p=0.119)         |

a. Obesity was defined as BMI >30 kg/m<sup>2</sup>, and severe obesity as BMI >40 kg/m<sup>2</sup>.

b. Adjusted for gender (male or female), age (grouped in ten years), education level (high school or above), income (>200 AUD or not), and smoking. Frequent consumers are people with response as "almost daily" or "several times a week" for each food item.

c. Weighted for gender (male or female), age (grouped in ten years), education level (high school or above), income (>200 AUD or not), and smoking.

Abbreviation: AUD, Australian dollar; BMI, body mass index; NCD, non-communicable disease.

**Supplement Table 3.** *Multivariable regressions between home garden use and obesity prevalence, among population without non-communicable diseases in Funafuti<sup>a</sup>*

| Predictor variables       | Unadjusted model                                 | Fully adjusted model <sup>b</sup>       | Overlap weight model <sup>c</sup>       |
|---------------------------|--------------------------------------------------|-----------------------------------------|-----------------------------------------|
| <b>(a) Obesity</b>        | Odds ratio (95% confidence interval and p-value) |                                         |                                         |
| Home garden use           | 0.835 (0.551-1.277,<br>p=0.400)                  | 0.779 (0.502-1.217,<br>p=0.268)         | 0.946 (0.862-1.038,<br>p=0.240)         |
| <b>(b) Severe obesity</b> |                                                  |                                         |                                         |
| Home garden use           | <b>0.552 (0.305-0.951,<br/>p=0.039)</b>          | <b>0.523 (0.284-0.916,<br/>p=0.029)</b> | <b>0.919 (0.856-0.986,<br/>p=0.019)</b> |

a. Obesity was defined as BMI >30 kg/m<sup>2</sup>, and severe obesity as BMI >40 kg/m<sup>2</sup>.

b. Adjusted for gender (male or female), age (grouped in ten years), education level (high school or above), income (>200 AUD or not), and smoking. Frequent consumers are people with response as "almost daily" or "several times a week" for each food item.

c. Weighted for gender (male or female), age (grouped in ten years), education level (high school or above), income (>200 AUD or not), and smoking.

Abbreviation: AUD, Australian dollar; BMI, body mass index; NCD, non-communicable disease.
